## Correction

**Correction: Antitumor activity of S116836, a novel tyrosine kinase inhibitor, against imatinib-resistant FIP1L1-PDGFR $\alpha$ -expressing cells****Yingying Shen<sup>1,\*</sup>, Xiaomei Ren<sup>2,\*</sup>, Ke Ding<sup>2</sup>, Zhang Zhang<sup>2</sup>, Deping Wang<sup>2</sup> and Jingxuan Pan<sup>1,3,4</sup>**<sup>1</sup>Department of Pathophysiology, Zhongshan School of Medicine, Sun Yat-sen University, Guangzhou, China<sup>2</sup>Key Laboratory of Regenerative Biology and Institute of Chemical Biology, Guangzhou Institute of Biomedicine and Health, Chinese Academy of Sciences, Guangzhou, China<sup>3</sup>State Key Laboratory of Ophthalmology, Zhongshan Ophthalmic Center, Sun Yat-sen University, Guangzhou, China<sup>4</sup>Collaborative Innovation Center for Cancer Medicine, State Key Laboratory of Oncology in South China, Sun Yat-Sen University Cancer Center, Guangzhou, 510060, China

\*These authors contributed equally to this work

**Published:****Copyright:** © 2021 Shen et al. This is an open access article distributed under the terms of the [Creative Commons Attribution License](#) (CC BY 3.0), which permits unrestricted use, distribution, and reproduction in any medium, provided the original author and source are credited.**This article has been corrected:** In Figure 3C, both immunoblots for P-Bim-EL (Ser69) are accidental duplicates (the same blots are shown for both time-dependent and dose-dependent). The corrected Figure 3C, produced using the original data, is shown below. The authors declare that these corrections do not change the results or conclusions of this paper.Original article: Oncotarget. 2014; 5:10407–10420. <https://doi.org/10.18632/oncotarget.2090>

**C**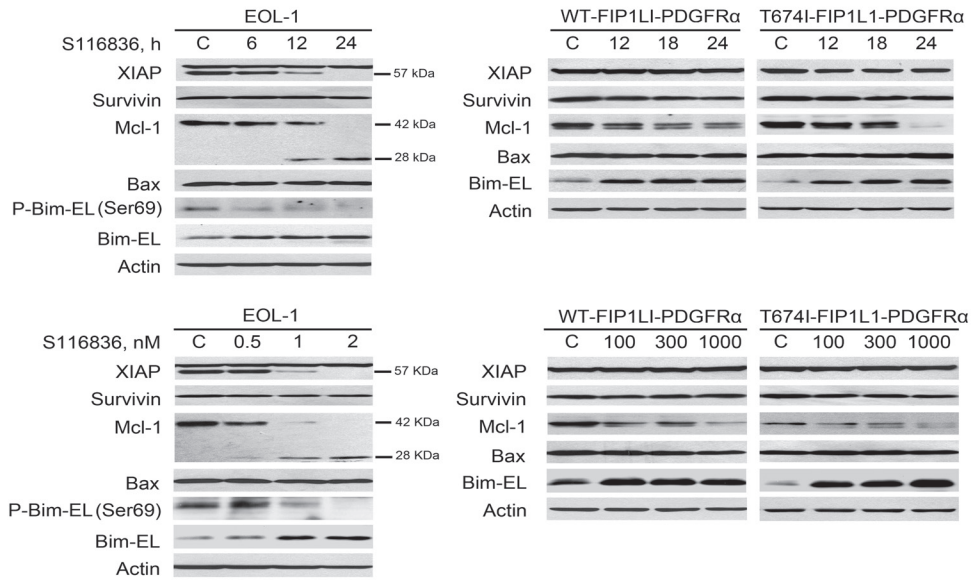

**Figure 3: S116836 induces apoptosis in FIP1L1-PDGFR $\alpha$ -expressing cells. (C)** Expression of apoptosis-related proteins was analyzed by Western blotting analysis.
